# Supplementary material
Source: PubMed Central journal article supplement (PMC1904377)

(A)

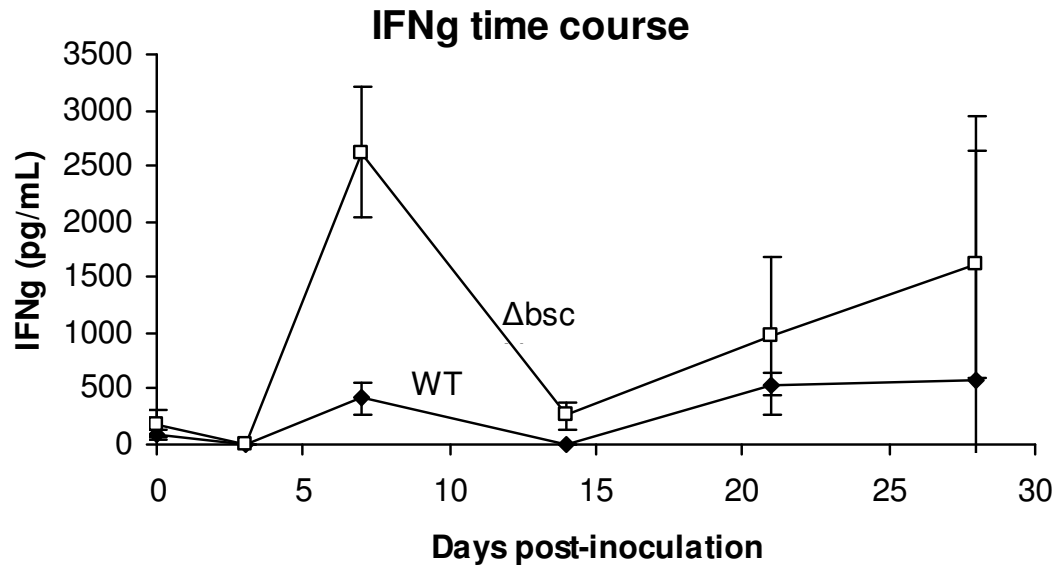

(B)

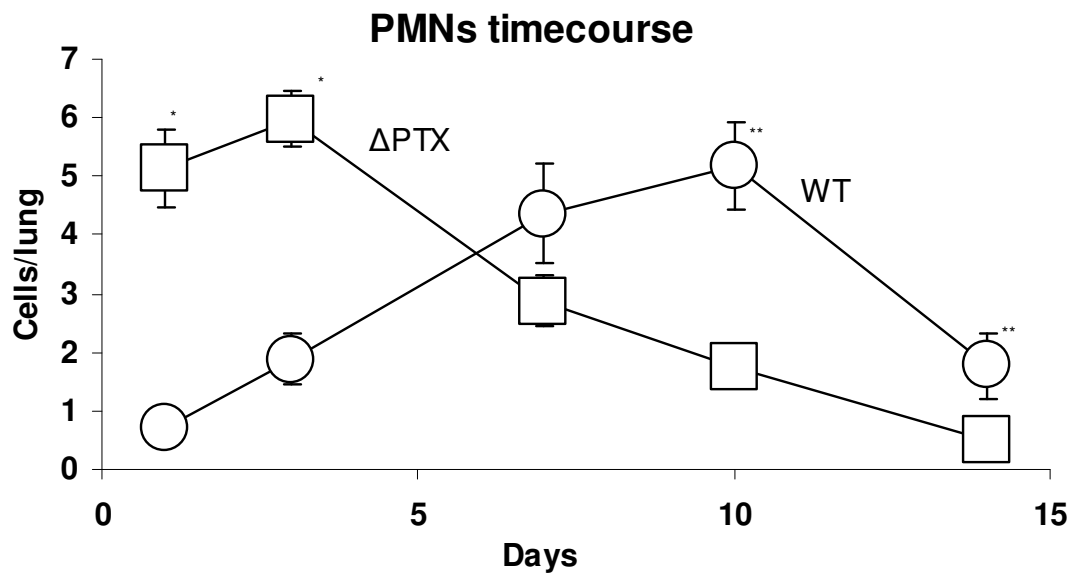

Supplement: pcbi.0030109.sg001.pdf [file pcbi.0030109.sg001.pdf]

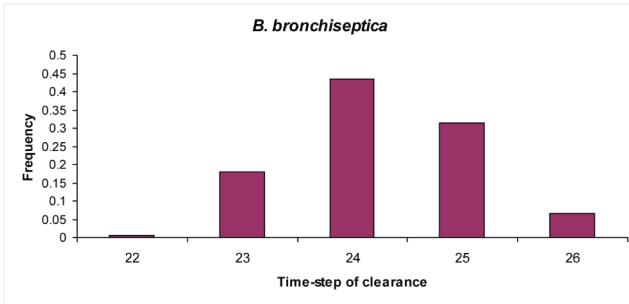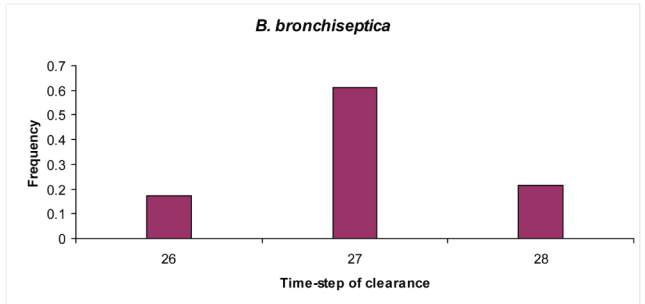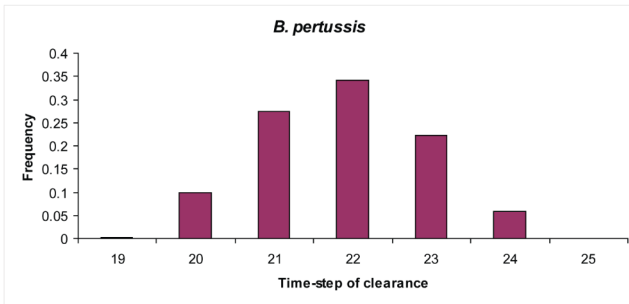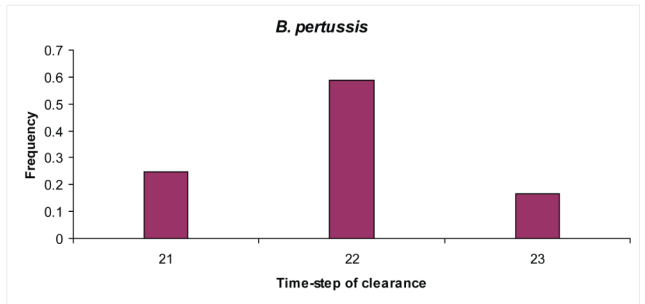

Supplement: pcbi.0030109.sg002.pdf [file pcbi.0030109.sg002.pdf]
